P5457

### Assessment of carotid cross sectional area in hypertensive patients: phenotyping and prognostic validation in the campania salute network

C. Mancusi, R. Izzo, M.A. Losi, E. Barbato, V. Trimarco, C. Morisco, G. Canciello, M.V. Manzi, F. Rozza, N. De Luca, G. De Simone, B. Trimarco

Federico II University of Naples, Naples, Italy

**Background:** Increased intima media thickness (IMT) of common carotid artery (CA) is considered the hallmark of vascular hypertension-mediated target organ damage, even though vessel remodeling due to mechanical stress can be accompanied also by changes in diameter.

**Purpose:** We developed a method computing both diameter and IMT of CA, and assessed correlates and prognostic impact of carotid cross sectional area (CCSA) in a large registry of treated hypertensive patients.

**Methods:** We selected 7049 hypertensive patients of the Campania Salute Network registry free of overt cardiovascular (CV) disease and with available CA ultrasound ( $54 \pm 11$  yrs; 57% male). CCSA was computed as:

$\pi \times [((\text{CA diameter} + 2 \times (\text{mean IMT})) / 2)]^2 - \pi \times [((\text{CA diameter}) / 2)]^2$

**Results:** CCSA was considered high if >90th percentile of the sex-specific

distribution ( $>48 \text{ mm}^2$  in men and  $>41 \text{ mm}^2$  in women). Higher CCSA correlated with older age, male sex, higher pulse pressure (PP), higher total and LDL cholesterol and presence of diabetes ( $p < 0.01$  for all). During a median follow-up of 45 months (IQR 19–92), 324 incident composite major and minor CV events occurred. In Cox regression analysis high CCSA was associated with more than 100% increased risk of incident CV events ( $p < 0.0001$ , figure), independently of the effect of older age, male sex, PP  $> 60 \text{ mmHg}$ , presence of left ventricular hypertrophy (LVH), carotid plaque (CP), and less anti-RAS therapy ( $p < 0.05$  for all).

**Conclusions:** In treated hypertensive patients, increased CCSA is associated with worse metabolic and lipid profile and predict incident CV events, independently of high PP, presence of LVH and CP.

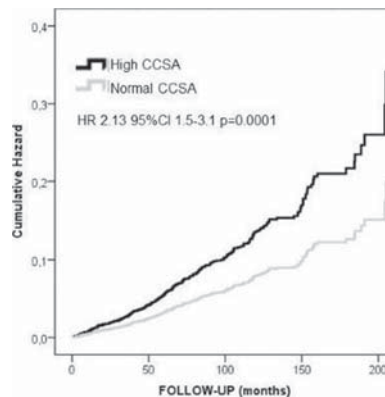

Source: http://academic.oup.com/eurheartj/article-pdf/40/Supplement_1/ehz746.0413/30201423/ehz746.0413.pdf
